# Supplementary figures and images for: Effect of surface oxygen/nitrogen groups on hydrogen chloride removal using modified viscose-based activated carbon fibers
Source: Royal Society of Chemistry journal article supplement (doi:10.1039/c5ra11705d), 2015-01-01

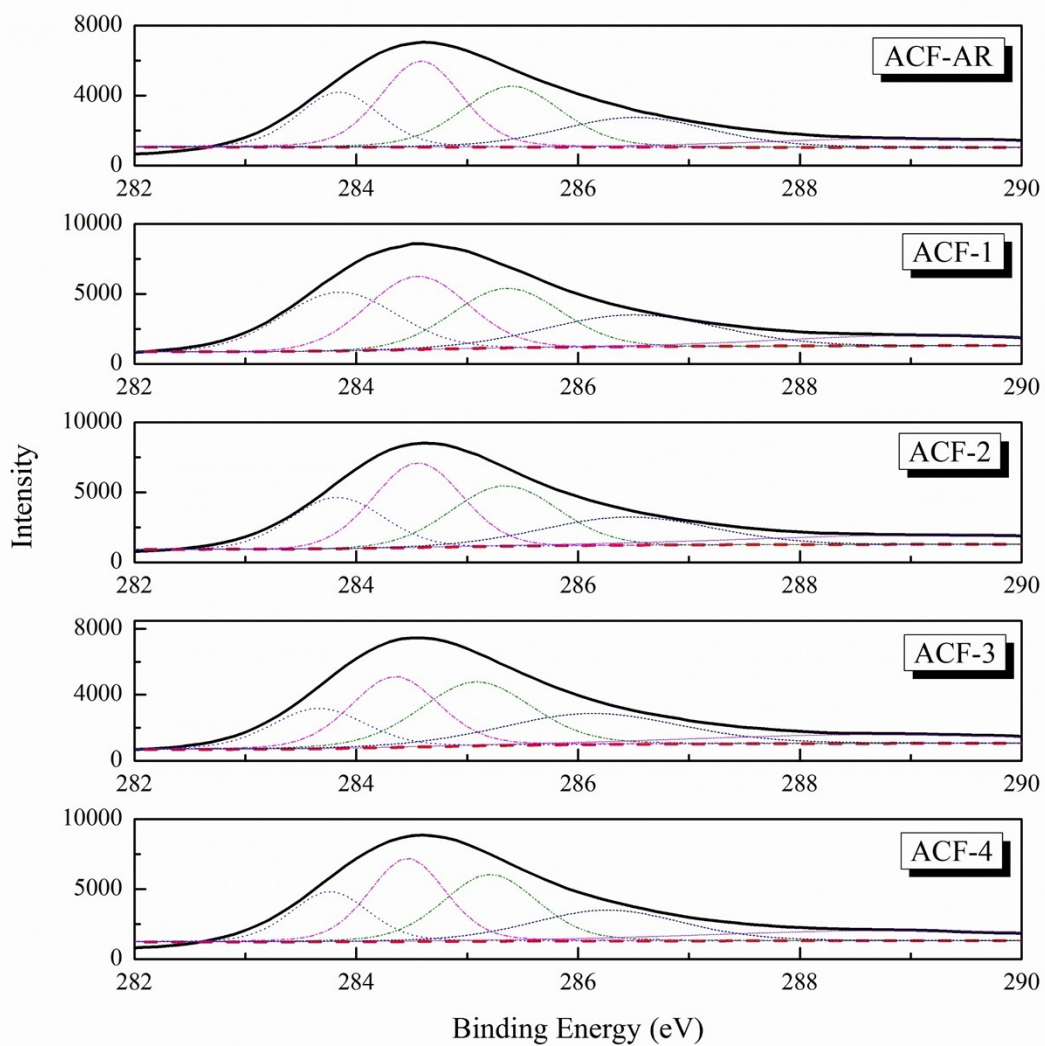

C<sub>1s</sub> subpeaks of XPS spectra of the ACFs

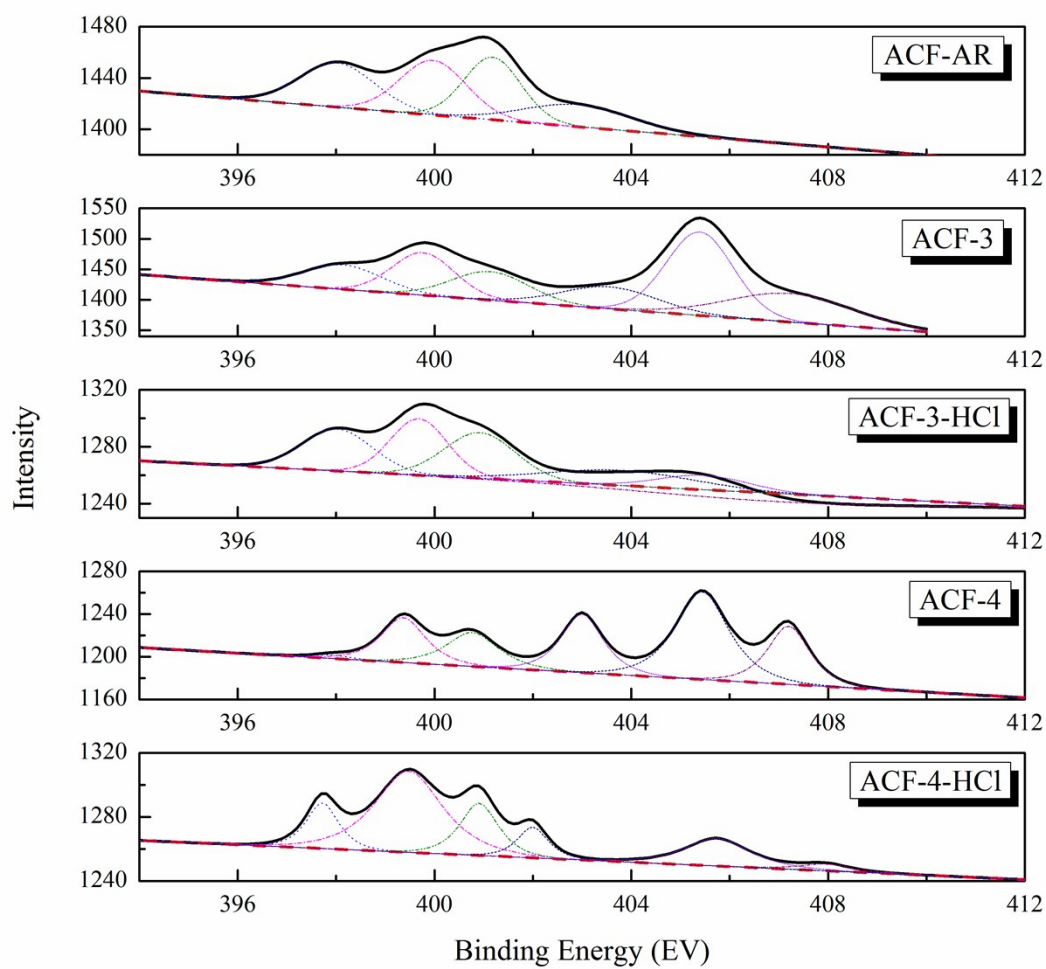

$N_{1s}$  subpeaks of XPS spectra of the ACFs

Supplement: c5ra11705d1.pdf [file c5ra11705d1.pdf]
